# Supplementary material for: Stigma Experiences, Mental Health, Perceived Parenting Competence, and Parent–Child Relationships Among Lesbian, Gay, and Heterosexual Adoptive Parents in the United States
Source: PubMed Central journal article supplement (PMC7141157; doi:10.3389/fpsyg.2020.00445), 2020-03-30
Supplement: Data_Sheet_1.pdf [file Data_Sheet_1.pdf]

## *Supplementary Material*

### *Summary of Multiple Regression of W1 Variables onto Adoption Stigma*

| Variable          | B   | SE(B) | $\beta$ | <i>t</i> | <i>p</i> |
|-------------------|-----|-------|---------|----------|----------|
| Mental health     | .42 | .18   | .18     | 2.27     | .024*    |
| Competence        | .08 | .15   | .04     | .50      | .616     |
| $R^2$             |     |       | .03     |          |          |
| <i>F</i> (2, 170) |     | 2.62  |         |          | .076     |

Note. \* $p < .05$

### *Summary of Multiple Regression of W2 Variables onto Adoption Stigma*

| Variable          | B    | SE(B) | $\beta$ | <i>t</i> | <i>p</i> |
|-------------------|------|-------|---------|----------|----------|
| Mental health     | .20  | .26   | .06     | .80      | .428     |
| Competence        | -.20 | .14   | -.11    | -1.42    | .158     |
| $R^2$             |      |       | .02     |          |          |
| <i>F</i> (2, 169) |      | 1.62  |         |          | .200     |

### *Summary of Multiple Regression of W1 Variables onto Current Homonegative Microaggressions*

| Variable         | B   | SE(B) | $\beta$ | <i>t</i> | <i>p</i> |
|------------------|-----|-------|---------|----------|----------|
| Mental health    | .25 | .16   | .18     | 1.52     | .132     |
| Competence       | .12 | .16   | .09     | .75      | .454     |
| $R^2$            |     |       | .03     |          |          |
| <i>F</i> (2, 92) |     | 1.16  |         |          | .318     |

### *Summary of Multiple Regression of W1 Variables onto Past Homonegative Microaggressions*

| Variable         | B   | SE(B) | $\beta$ | <i>t</i> | <i>p</i> |
|------------------|-----|-------|---------|----------|----------|
| Mental health    | .22 | .24   | .11     | .91      | .368     |
| Competence       | .06 | .23   | .03     | .25      | .802     |
| $R^2$            |     |       | .01     |          |          |
| <i>F</i> (2, 92) |     | .42   |         |          | .658     |

*Summary of Multiple Regression of W1 Variables onto Impact Homonegative Microaggressions*

| Variable      | B    | SE(B) | $\beta$ | <i>t</i> | <i>p</i> |
|---------------|------|-------|---------|----------|----------|
| Mental health | .31  | .29   | .12     | 1.07     | .289     |
| Competence    | -.03 | .28   | -.01    | -.12     | .904     |
| $R^2$         |      |       | .02     |          |          |
| $F(2, 92)$    |      | .77   |         |          | .466     |

*Summary of Multiple Regression of W1 Variables onto Past\*Impact Homonegative Microaggressions*

| Variable      | B    | SE(B) | $\beta$ | <i>t</i> | <i>p</i> |
|---------------|------|-------|---------|----------|----------|
| Mental health | 1.32 | 1.19  | .13     | 1.11     | .271     |
| Competence    | .12  | 1.14  | .01     | .11      | .914     |
| $R^2$         |      |       | .02     |          |          |
| $F(2, 92)$    |      | .69   |         |          | .503     |

*Summary of Multiple Regression of W1 Variables onto Current\*Impact Homonegative Microaggressions*

| Variable      | B    | SE(B) | $\beta$ | <i>t</i> | <i>p</i> |
|---------------|------|-------|---------|----------|----------|
| Mental health | 1.44 | .92   | .18     | 1.56     | .122     |
| Competence    | .60  | .88   | .08     | .68      | .497     |
| $R^2$         |      |       | .03     |          |          |
| $F(2, 92)$    |      | 1.22  |         |          | .300     |

*Summary of Multiple Regression of W2 Variables onto Current Homonegative Microaggressions*

| Variable      | B    | SE(B) | $\beta$ | <i>t</i> | <i>p</i> |
|---------------|------|-------|---------|----------|----------|
| Mental health | .40  | .20   | .21     | 1.97     | .052     |
| Competence    | -.03 | .15   | -.02    | -.16     | .873     |
| $R^2$         |      |       | .04     |          |          |
| $F(2, 91)$    |      | 2.01  |         |          | .140     |

*Summary of Multiple Regression of W2 Variables onto Past Homonegative Microaggressions*

| Variable      | B    | SE(B) | $\beta$ | <i>t</i> | <i>p</i> |
|---------------|------|-------|---------|----------|----------|
| Mental health | .86  | .29   | .30     | 3.01     | .003**   |
| Competence    | -.21 | .22   | -.01    | -.98     | .329     |
| $R^2$         |      |       | .11     |          |          |
| $F(2, 91)$    |      | 5.40  |         |          | .006**   |

Note. \*\* $p < .01$

*Summary of Multiple Regression of W2 Variables onto Impact Homonegative Microaggressions*

| Variable         | B    | SE(B) | $\beta$ | <i>t</i> | <i>p</i> |
|------------------|------|-------|---------|----------|----------|
| Mental health    | .68  | .37   | .20     | 1.87     | .065     |
| Competence       | -.05 | .28   | -.02    | -.18     | .861     |
| $R^2$            |      |       | .04     |          |          |
| <i>F</i> (2, 91) |      | 1.82  |         |          | .168     |

*Summary of Multiple Regression of W2 Variables onto Past\*Impact Homonegative Microaggressions*

| Variable         | B    | SE(B) | $\beta$ | <i>t</i> | <i>p</i> |
|------------------|------|-------|---------|----------|----------|
| Mental health    | 3.44 | 1.49  | .24     | 2.32     | .023     |
| Competence       | -.76 | 1.12  | -.07    | -.68     | .498     |
| $R^2$            |      |       | .07     |          |          |
| <i>F</i> (2, 91) |      | 3.13  |         |          | .049     |

*Summary of Multiple Regression of W2 Variables onto Current\*Impact Homonegative Microaggressions*

| Variable         | B    | SE(B) | $\beta$ | <i>t</i> | <i>p</i> |
|------------------|------|-------|---------|----------|----------|
| Mental health    | 2.01 | 1.17  | .18     | 1.72     | .089     |
| Competence       | .03  | .88   | .004    | .04      | .969     |
| $R^2$            |      |       | .03     |          |          |
| <i>F</i> (2, 91) |      | 1.49  |         |          | .231     |
